1 **Mushroom body specific transcriptome analysis reveals dynamic regulation of**  
2 **learning and memory genes after acquisition of long-term courtship memory in**  
3 ***Drosophila*.**

4  
5 Spencer G. Jones<sup>\*, †</sup>, Kevin C.J. Nixon<sup>‡</sup>, and Jamie M. Kramer<sup>\*, †, ‡, §</sup>

6 Department of Neuroscience<sup>\*</sup>, Department of Biology<sup>†</sup>, Department of Physiology and  
7 Pharmacology<sup>‡</sup>, Children's Health Research Institute<sup>§</sup>  
8 University of Western Ontario, London, Ontario Canada

9  
10  
11  
12  
13  
14  
15  
16  
17  
18  
19  
20  
21  
22  
23  
24

Keywords: Long-term memory, transcriptome analysis, courtship conditioning

## 25 **Abstract**

26           The formation and recall of long-term memory (LTM) requires neuron activity-  
27 induced gene expression. Transcriptome analysis has been used to identify genes that  
28 have altered expression after memory acquisition, however, we still have an incomplete  
29 picture of the transcriptional changes that are required for LTM formation. The complex  
30 spatial and temporal dynamics of memory formation creates significant challenges in  
31 defining memory-relevant gene expression changes. The mushroom body (MB) is a  
32 signaling hub in the insect brain that integrates sensory information to form memories.  
33 Here, we performed transcriptome analysis in the *Drosophila* MB at two time points after  
34 the acquisition of LTM: 1 hour and 24 hours. The MB transcriptome was compared to  
35 biologically paired whole head (WH) transcriptomes. In both, we identified more  
36 transcriptional changes 1 hour after memory acquisition (WH = 322, MB = 302) than at  
37 24 hours (WH = 23, MB = 20). WH samples showed downregulation of developmental  
38 genes and upregulation of sensory response genes. In contrast, MB samples showed  
39 vastly different gene expression changes affecting biological processes that are  
40 specifically related to LTM. MB-downregulated genes were highly enriched for  
41 metabolic function, consistent with the MB-specific energy influx that occurs during LTM  
42 formation. MB-upregulated genes were highly enriched for known learning and memory  
43 processes, including calcium-mediated neurotransmitter release and cAMP signalling.  
44 The neuron activity inducible genes *hr38* and *sr* were also specifically induced in the  
45 MB. These results highlight the importance of sampling time and cell type in capturing  
46 biologically relevant transcriptional changes involved in learning and memory. Our data  
47 suggests that MB cells transiently upregulate known memory-related pathways after

48 memory acquisition and provides a critical frame of reference for further investigation  
49 into the role of MB-specific gene regulation in memory.

50

51

## 52 Introduction

53 Learning and memory can be measured in experimental organisms by observing  
54 altered behaviour in response to manipulated experiences. The duration of behavioural  
55 changes induced by different learning and memory paradigms may be transient or  
56 stable <sup>1,2</sup>. While the formation of both short-term and long-term memories require similar  
57 underlying molecular mechanisms such as calcium- and cAMP-dependent signaling  
58 pathways, only long-term memory (LTM) requires gene transcription and *de novo*  
59 protein synthesis <sup>3-5</sup>. While many genes have been implicated in LTM formation <sup>6</sup>, we  
60 still know very little about the spatial and temporal dynamics of gene regulation that are  
61 required for LTM.

62 The fruit fly, *Drosophila melanogaster*, has been a powerful model for the  
63 discovery of genes and molecular mechanisms underlying learning and memory <sup>5,7,8</sup>.  
64 Transcriptome analysis has been used to identify genes expression changes in flies  
65 after the acquisition of LTM <sup>9-13</sup>. Several studies have profiled transcriptional changes in  
66 whole heads <sup>9-11</sup> which has led to the identification of genes that are required for LTM  
67 <sup>9,11</sup>. Despite the success of these whole head studies, it is clear that LTM requires only  
68 a subset of neurons that are both spatially and temporally regulated <sup>14-16</sup>. Cell-type  
69 specific analysis of different neuronal subsets will be required to identify gene  
70 expression changes that are critical for memory <sup>17</sup>.

71 The mushroom body (MB) is a region of the fly brain that is critical for normal  
72 memory <sup>18,19</sup>. This synaptically dense structure appears as a pair of neuropils each  
73 consisting of ~2000 neurons with three distinct neuronal subtypes ( $\alpha/\beta$ ,  $\alpha'/\beta'$ , and  $\gamma$ ) that  
74 contribute the formation of 5 distinct lobes  $\alpha$ ,  $\alpha'$ ,  $\beta$ ,  $\beta'$ , and  $\gamma$  <sup>20</sup>. Intrinsic MB neurons,

75 called Kenyon cells (KC), form a hub for integration of sensory information from over  
76 200 olfactory projection neurons and 20 different modulatory dopaminergic neurons <sup>21</sup>.  
77 Sensory information is processed in the MB and relayed through just 21 MB output  
78 neurons (MBONs) <sup>22</sup>. Because of its essential role in memory, the MB is a logical  
79 starting point in the search for LTM-dependent gene expression changes. MB-specific  
80 transcriptome analysis has led to the discovery of additional genes that are important for  
81 LTM, however, similar to whole head analysis, no consistent LTM-dependent gene  
82 regulatory patterns have been observed <sup>12,13</sup>. This lack of consistency - in both whole  
83 head and MB-targeted transcriptome analysis - is likely due to a range of factors  
84 including differences in sampling time, e.g. 30 minutes vs. 12 hours after memory  
85 acquisition. Indeed, gene expression changes are known to vary at different time points  
86 after memory acquisition <sup>23</sup>. It is also likely that memory dependent gene expression  
87 changes will differ based on physiological differences resulting from the different  
88 memory paradigms used, e.g. appetitive vs. aversive olfactory conditioning. Indeed, it  
89 has been shown that neuron activity regulated gene expression is highly specific not  
90 only to neuron type but also to the stimulation paradigm <sup>24</sup>. Therefore, in order to identify  
91 gene regulatory mechanisms that are essential for memory, it will be important to  
92 investigate different memory paradigms, different neuronal subsets, and different time-  
93 points during and after memory acquisition.

94 Courtship conditioning is a well-established learning and memory paradigm that  
95 has been commonly used to investigate the molecular mechanisms underlying memory  
96 <sup>19,25-27</sup>. Courtship conditioning relies on male courtship behaviour being modifiable in  
97 response to sexual rejection from a mated unreceptive female <sup>28,29</sup>. After experiencing

98 sexual rejection males show reduce courting attempts with other pre-mated females; an  
99 effect which can persist for several days<sup>19,27</sup>. Courtship memory forms via an enhanced  
100 behavioural response to the pheromone cis-vaccenyl-acetate (cVA), which is deposited  
101 on females by males during prior mating attempts<sup>30</sup>. The MB is required for the  
102 acquisition of normal long-term courtship memory<sup>19</sup>. While courtship conditioning has  
103 molecular properties similar to other memory paradigms<sup>31</sup>, it is distinct in that it  
104 manipulates a complex, naturally occurring behaviour with minimal experimental  
105 interference<sup>30–32</sup>. This makes courtship conditioning an attractive model that takes  
106 advantage of a robust but ethological form of memory.

107       Here, we use INTACT (isolation of nuclei tagged in a specific cell type)<sup>33</sup> to  
108 profile gene expression in MBs at two time points after the acquisition of long-term  
109 courtship memory. We find a dynamic effect on the regulation of learning and memory  
110 genes during LTM formation in MBs. Many known learning and memory genes are  
111 transiently upregulated in MBs one-hour after memory acquisition and return to baseline  
112 levels after 24 hours. This effect is specific to MBs, as whole head transcriptome  
113 analysis did not reveal gene regulatory changes in known memory associated biological  
114 pathways. This suggests a high demand for classic learning and memory genes in MBs  
115 after the acquisition of courtship memory and highlights the importance of sampling time  
116 and cell type in the detection of biologically relevant transcriptional changes underlying  
117 memory.

118

## 119 **Results**

### 120 **MB-unc84 males display normal long-term courtship memory**

121 The aim of this study was to identify MB-specific transcriptional changes that  
122 occur after the acquisition of long-term courtship memory. To achieve this, we used  
123 INTACT<sup>33–35</sup> to isolate MB nuclei from fly heads, 1 h and 24 h after courtship  
124 conditioning (**Figure 1A**). We adapted a previously described INTACT protocol that  
125 employed a *UAS-unc84::GFP* transgene<sup>33</sup>. Unc-84 is a *Caenorhabditis elegans* nuclear  
126 envelope protein, and when coupled with GFP, Unc84::GFP labeled nuclei can be  
127 immunoprecipitated from nuclear extracts derived from frozen tissue using an anti-GFP  
128 antibody. To drive expression of *UAS-unc84::GFP* in the MB, we used the *R14H06-*  
129 *GAL4* driver line from the Janelia flylight collection<sup>36</sup>. This driver is highly specific for the  
130  $\alpha/\beta$  and  $\gamma$  neurons of the mushroom body (**Figure 1A**). We generated flies that were  
131 heterozygous for both the *UAS-unc84* transgene and the *R14H06-GAL4* driver, which  
132 are hereafter referred to as *MB-unc84*.

133 To induce long-term courtship memory, *MB-unc84* males were paired with an  
134 unreceptive mated female for seven hours. Flies for transcriptome analysis were flash  
135 frozen at 1 h and 24 h after this period of sexual rejection (1h-AR and 24h-AR, **Figure**  
136 **1A**). These time points were selected to capture both early and late stages after  
137 memory acquisition. We avoided sampling during the rejection period to avoid the direct  
138 effect of being paired with a female<sup>37,38</sup>. A minimum of four biological replicates was  
139 obtained for each time point. In parallel with these collections, we tested a subset of  
140 *MB-unc84* flies to confirm the induction of normal long-term courtship memory. Indeed,  
141 at 24h-AR *MB-unc84* males showed a robust reduction in courtship behaviour in  
142 comparison to naïve males (**Figure 1B**;  $p < 0.001$  Mann-Whitney *U*-test). This observed  
143 courtship suppression in *MB-unc84* flies was in line with expected values from the

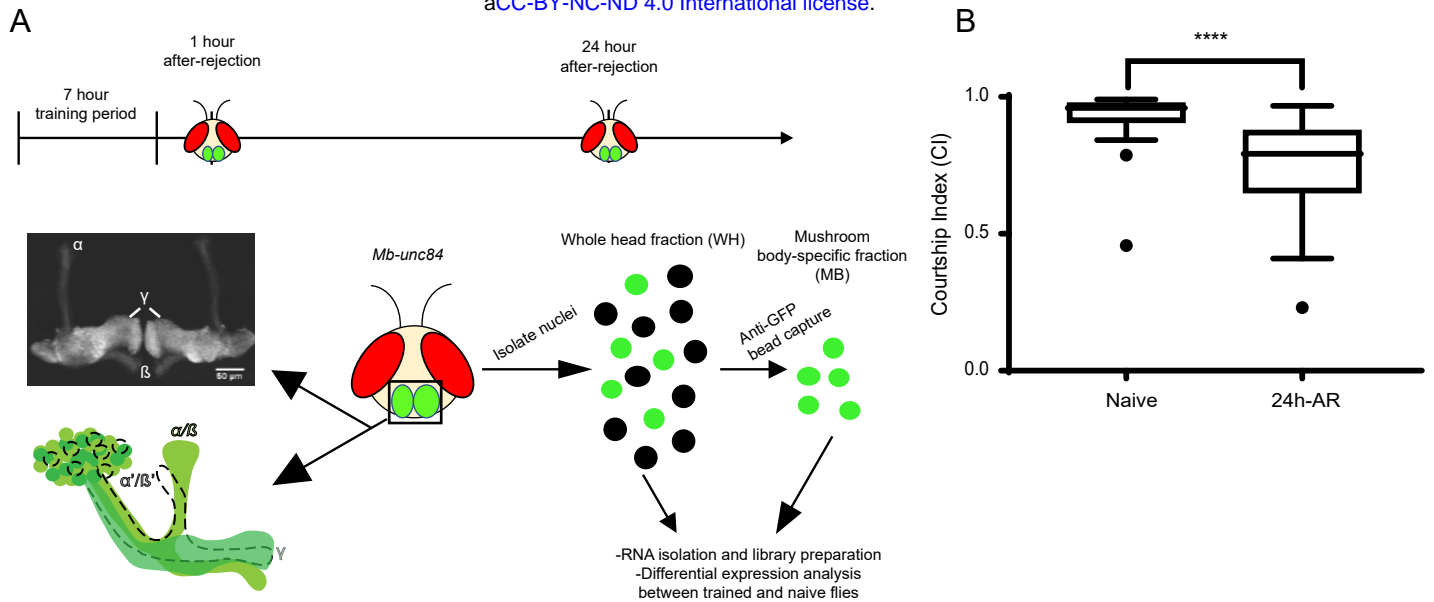

**Figure 1. Schematic of the experimental design and validation of courtship conditioning to induce LTM. A)** Long-term memory (LTM) was induced in flies using a previously established seven-hour courtship conditioning protocol. Following training, flies were collected for downstream transcriptome analysis at two time points: one hour and 24 hours after-rejection. Flies used for analysis were heterozygous for both *R14H06-GAL4* and a GFP-bound nuclear membrane tag *UAS\_unc84-2XGFP* (*unc84*), referred to as *Mb-unc84*. The *R14H06* GAL4 line was used to drive the expression of *unc84* as it is specific to the Kenyon cells of the  $\alpha/\beta$  and  $\gamma$  lobes of the mushroom body, regions still requiring further investigation during LTM. Fly heads were obtained from samples of 50-60 flies through flash freezing with liquid nitrogen, followed by vortexing and separation through a series of sieves. Fly heads were then suspended in homogenization buffer and nuclei released into solution through chemical and physical agitation of the cell membrane. A whole head fraction (WH) was then taken from this homogenate as a representation of the whole fly head, containing both MB-specific GFP nuclei and untagged non-MB nuclei. Anti-GFP bound beads were then used to isolate GFP-positive nuclei from the whole head homogenate to represent the mushroom body-specific fraction (MB). RNA was then isolated from both WH and MB-fractions, cDNA libraries prepared and next-generation sequencing performed. Differential expression (DE) analysis was then performed between trained flies and untrained, naïve flies. **B)** To provide evidence of normal LTM functioning in flies used for analysis, a subset of flies from each day of training were tested for retained courtship suppression 24 hours later (24h-AR). Individual trained and naïve male flies were introduced to a pre-mated female, videoing their interactions for 10 minutes and quantifying observed courtship behaviours. The amount of time spent courting is represented as a courtship index (C.I.). For this experiment,  $n = 23$  and  $n = 29$ , respectively, for naïve and trained flies; \*\*\*\*  $p < 0.001$  Mann-Whitney U-test.



144 literature <sup>19,25,27</sup>, demonstrating that *UAS-unc84::GFP* expression in the MB does not  
145 interfere with normal courtship memory.

146

### 147 **INTACT yields high-quality MB-enriched RNA**

148 To provide evidence that our approach could obtain nuclei specific to the MB, we  
149 used fluorescent microscopy to measure the proportion of GFP-positive nuclei present  
150 in whole head (WH) extracts, compared to INTACT MB samples. WH nuclear extracts  
151 obtained from *MB-unc84* flies contained 8% GFP positive nuclei (**Figure 2A**). Note that  
152 this is likely an overestimation, as we only analyzed fields of view containing GFP-  
153 positive nuclei, which were not present throughout the slide. After immunoprecipitation  
154 of nuclei from WH extracts using anti-GFP bound beads, about 90% of nuclei were  
155 GFP-positive, indicating a high level of specificity of our INTACT protocol (**Figure 2A**).

156 Next, INTACT was used to extract MB nuclei from *MB-unc84* flies' heads at 1h-  
157 AR and 24h-AR, as well as from naïve flies matched for age and time-of-day. For each  
158 MB sample, we also obtained RNA from nuclei present in the biologically paired WH  
159 input for comparison. After verification of RNA quality, sequencing libraries were  
160 prepared from both WH and MB samples. Completed libraries were sequenced and  
161 reads were aligned to the *D. melanogaster* genome. Samples that had >10 million genic  
162 reads were included for downstream analysis, resulting in a total of 12 MB samples: four  
163 naïve, four 1h-AR, four 24h-AR - and 12 WH samples - five naïve, three 1h-AR, four  
164 24h-AR (**Table S1**).

165 To confirm consistent MB enrichment in MB samples we examined gene  
166 expression differences between WH and MB samples. DESeq2 was used to normalize

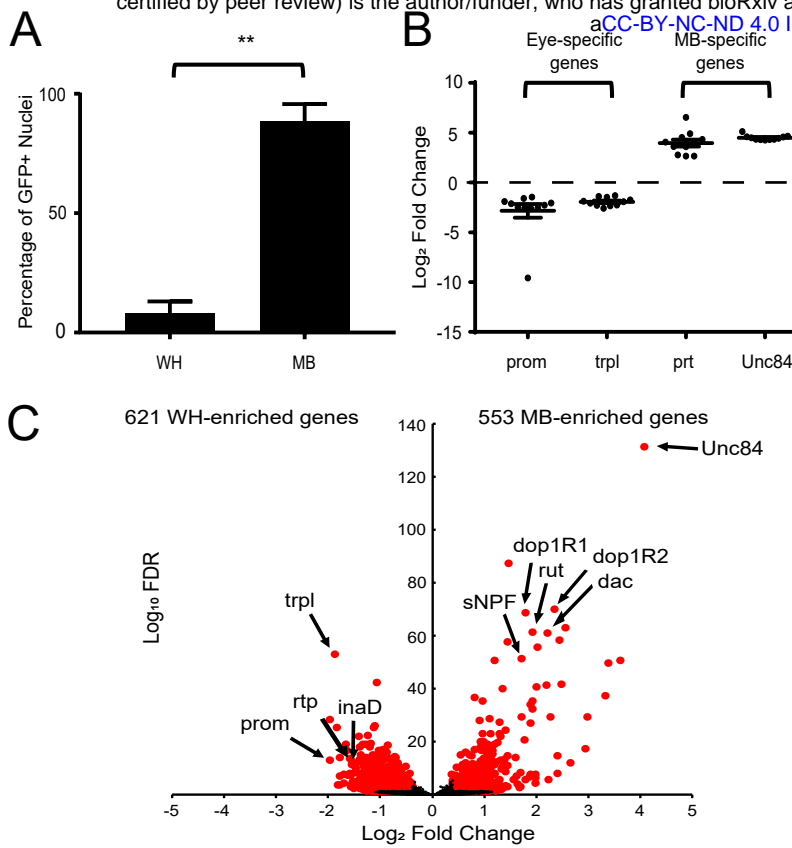

**Figure 2. INTACT yields high-quality MB-enriched RNA.**

**A)** Average percentage ( $\pm$  SD) of GFP positive nuclei in WH and MB samples ( $n=3$ ) obtained using INTACT. MB samples show a 13.8-fold increase (\*\*  $p < 0.01$ , Student's t-test) in the percentage of GFP positive nuclei compared to WH samples. **B)** Scatter dot plot of log<sub>2</sub> fold changes for a selection of genes with known expression in the eye (*prom*, *trpl*), representing the whole fly head, the mushroom body (MB) (*prt*), as well as the genetically expressed nuclear tag *unc84*. Fold changes were calculated for biologically paired WH and MB samples ( $n=11$ ) using normalized counts across all samples. Error bars represent standard error of the mean. **C)** Differential expression (DE) analysis was performed on all MB and WH samples after removing genes with less than 50 mean normalized counts. Volcano plot shows the results of this analysis, which revealed 553 and 621 DE genes ( $q < 0.05$ , fold difference  $> 1.3$ ), respectively, in MB-enriched and WH-enriched samples. A selection of genes previously known to be enriched in both MB-cells (*rut*, *dac*), KC's (*sNPF*, *Dop1R1*, *Dop1R2*) and WH-cells (*trpl*, *prom*, *rtp*, *inaD*), as well as *unc84*, are highlighted. **D)** Gene ontology (GO) analysis was performed separately on lists of MB-enriched and WH-enriched DE genes. Significant terms ( $p < 0.05$ , Fisher Exact with FDR multiple test correction, minimum four genes) with the highest enrichment for biological processes (BP), molecular functions (MF) and cellular components (CC) are displayed for both MB and WH-enriched DE lists.

**D**

| MB-enriched GO term                                                   | Fold enrichment |
|-----------------------------------------------------------------------|-----------------|
| Adenylate cyclase-activating dopamine receptor signaling pathway (BP) | 14.35           |
| Acetylcholine receptor activity (MF)                                  | 14.35           |
| cAMP-dependent protein kinase complex (CC)                            | 16.74           |

  

| WH-enriched GO term                           | Fold enrichment |
|-----------------------------------------------|-----------------|
| Detection of UV (BP)                          | 19.3            |
| G-protein coupled photoreceptor activity (MF) | 17.37           |
| Rhabdomere microvillus (CC)                   | 18.53           |

167 gene counts between all MB and WH samples and genes with less than 50 mean  
168 normalized counts across all samples were removed, leaving a total of 11941 genes  
169 with sufficient coverage. Log<sub>2</sub> fold changes were then calculated for biologically paired  
170 WH and MB samples. As expected, eye-specific genes like *prom* and *trpl* were  
171 underrepresented in MB-samples, while MB-enriched genes, such as *portabella* and  
172 *unc84* were overrepresented in the MB samples (**Figure 2B**). Notably, *unc84*  
173 expression was highly enriched and highly consistent across all biological replicates  
174 suggesting a high degree of consistency in MB-enrichment after INTACT.

175 To provide further evidence that the nuclei we isolated displayed MB-specific  
176 gene expression profiles we performed differential expression analysis between all MB  
177 and WH samples. We identified 553 and 621 genes (FDR < 0.05, fold difference > 1.3)  
178 that were significantly enriched in either MB or WH samples, respectively (**Figure 2C**;  
179 complete list in **Table S2**). Many known MB-expressed genes, including *rutabaga*,  
180 *dunce*, *prt*, *eyeless*, *twin of eyeless*, and *dachshund* were among the most differentially  
181 expressed MB-enriched genes<sup>7,39–41</sup>. In contrast, several eye-specific genes, such as  
182 *prom*, *trpl*, *inaD*, and *rtp*, were among the most differentially expressed WH-enriched  
183 genes (**Figure 2C**). Additionally, we compared MB-enriched genes to cell surface  
184 receptors that were found to be characteristically expressed in  $\alpha/\beta$  and  $\gamma$  KC's when  
185 compared to MBONs<sup>12</sup>. Indeed, many of these receptors were also found to be  
186 enriched in our dataset including: *Dop1R2*, *Dop1R1*, *Dop2R*, *5-HT1B*, *Oamb*, *Oct $\beta$ R*,  
187 *sNPF*, *GluRIB*, *Ir68a*, *CCKLR-17D1*, *CCKLR-17D3*, *GluRIB*, and *mAChR-A* (**Table S2**).  
188 Finally, we examined gene ontology (GO) terms enriched for biological processes (BP),  
189 molecular functions (MF), as well as cellular components (CC), among our lists of MB-

190 enriched and WH-enriched genes (**Figure 2D, Table S3**). The most enriched GO terms  
191 for MB-enriched genes were “cAMP-dependent protein kinase complex” (CC) and  
192 “adenylate cyclase-activating dopamine receptor signaling pathway” (BP) (**Figure 2D**),  
193 which fits with the known importance of dopaminergic modulatory neurons and cAMP  
194 signaling in memory formation in the MB <sup>22,30,42,43</sup>. The most enriched GO term for MF  
195 was “acetylcholine receptor activity”, consistent with previous studies which showed that  
196 MB KC’s are cholinergic and receive input from cholinergic olfactory projection neurons  
197 <sup>12,44,45</sup>. In contrast, the most enriched GO terms for the WH enriched genes were all  
198 related to eye function, including “detection of UV” (BP), “G-protein coupled  
199 photoreceptor activity” (MF) and “rhabdomere microvillus” (CC) (**Figure 2D**). Taken  
200 together, analysis of genes that are differentially expressed between WH and MB  
201 samples revealed a pattern of gene expression that is highly consistent with an effective  
202 MB enrichment.

203

### 204 **Gene expression changes after memory acquisition**

205 Next, we used DESeq2 to identify genes that were differentially expressed (DE)  
206 in response to courtship conditioning by comparing 1h-AR and 24h-AR to naïve flies.  
207 For both WH and MB samples we observed more DE genes at 1h-AR than at 24h-AR  
208 (n=322/23, n=302/20, for WH and MB sample 1h-AR/24h-AR, respectively). There was  
209 some overlap in DE genes between 1h-AR and 24h-AR, and between WH and MB  
210 samples, however, most DE genes identified in WH and MB samples were different  
211 (**Figure 3A**). To investigate trends in gene expression after courtship conditioning we  
212 compiled a list of all DE genes that were differentially expressed in at least one of the

213 three pairwise comparisons: 1h-AR vs. naïve, 24h-AR vs. naïve, and 1h-AR vs. 24h-AR  
214 (**Table S4**). This led to the identification of 332 and 342 DE genes for WH and MB  
215 samples, respectively. For each tissue, we performed *k*-means clustering on log<sub>2</sub> fold  
216 changes at 1h-AR and 24h-AR (**Figure 3B and 3C, Table S5**). In WH samples, four  
217 clusters were identified with two distinct trends: cluster 1 and 2 (n=22 and 127)  
218 contained genes that were downregulated at 1h-AR and either reduced or not changed  
219 at 24h-AR (WH-down, **Figure 3B and Table S5**). Cluster 3 and 4 (n = 72 and 114)  
220 contained genes that were upregulated at 1h-AR and either less upregulated or not  
221 changed at 24h-AR (WH-up - **Figure 3B and Table S5**). For MB samples *k*-means  
222 clustering revealed five clusters with three distinct expression trends. Cluster 1 (n = 30)  
223 contained genes that were downregulated at 1h-AR and upregulated 24h-AR. Clusters  
224 2, 3, and 4 (n=2, 13 and 120, respectively) contained genes that were downregulated at  
225 1h-AR and either downregulated or not changed at 24h-AR (MB-down - **Figure 3C and**  
226 **Table S5**). Cluster 5 (n = 174) contained genes that were upregulated at 1h-AR and  
227 either upregulated or not changed at 24h-AR (MB-up- **Figure 3C and Table S5**). This  
228 clustering allowed us to identify gene groups with similar expression trends and  
229 emphasized the relatively strong effect of sexual rejection at 1h-AR.

230

231 **Courtship conditioning is associated with MB-specific downregulation of**  
232 **metabolic genes.**

233 To investigate the functions of genes that are differentially expressed in response  
234 to courtship conditioning, we first performed GO enrichment analysis for gene clusters  
235 with similar expression trends. For WH-down genes (n = 149, **Figure 3B**) we observed,

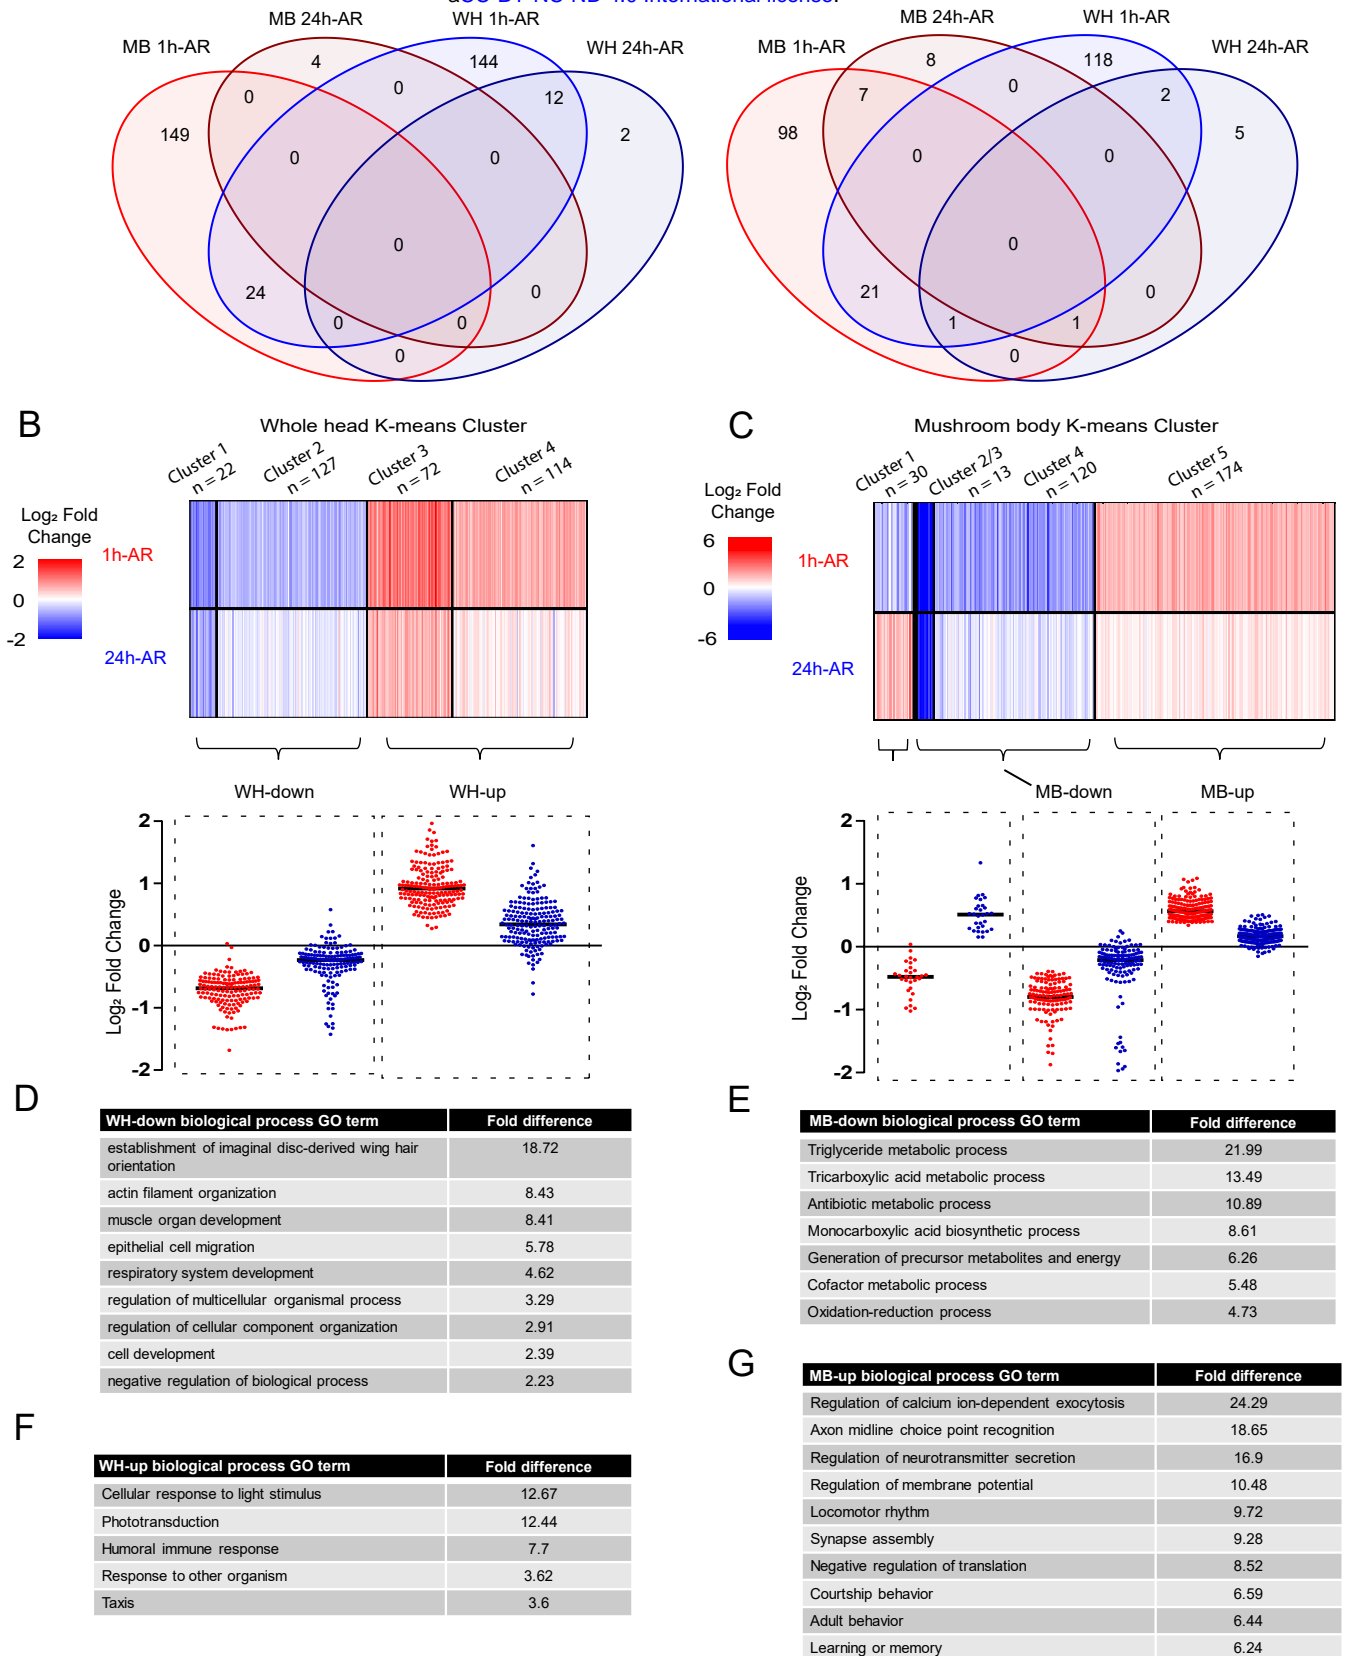

**Figure 3. Differential expression and clustering analysis of MB and WH sequencing results**

**A)** Venn diagram shows overlap between MB and WH differentially expressed (DE) gene lists ( $q < 0.05$ , fold difference 1.3 up or down) for both upregulated and downregulated genes. **B)** A list of 336 WH DE genes ( $q < 0.05$ , fold difference 1.3 up or down) was determined through DE analysis of all three experimental conditions (1h-AR vs naïve, 24h-AR vs naïve and 24h-AR vs 1h-AR). Log<sub>2</sub> fold change data was obtained for significant genes at both one hour, as well as 24-hour time points and clustered using *k*-means. Four clusters were identified with two distinct trends. Cluster 1 and 2 were downregulated at both time-points (WH-down) and cluster 3 and 4 were upregulated at both time-points (WH-up). Heatmap shows the individual log<sub>2</sub> fold changes for each clustered gene. Scatter dot plot shows log<sub>2</sub> fold changes for genes with similar expression trends. **C)** A list of 343 MB DE genes ( $q < 0.05$ , fold difference 1.3 up or down) was determined using the same approach as that used for WH DE genes. Log<sub>2</sub> fold change data was obtained for significant genes at both one hour, as well as 24-hour time points and clustered using *k*-means. Five clusters were identified with three distinct trends. Cluster 1 was downregulated 1h-AR and upregulated 24h-AR. Cluster 2, 3 and 4 were downregulated at both time-points (MB-down). Cluster 5 was upregulated at both time-points (MB-up). Heatmap shows the individual log<sub>2</sub> fold changes for each clustered gene. Scatter dot plot shows log<sub>2</sub> fold changes for genes with similar expression trends. **D)** GO analysis results using PANTHER for biological processes for WH-down genes ( $p < 0.05$ , Binomial test with Bonferroni correction, sorted by hierarchical view). The top nine GO terms, representing each ontology class and containing at least five genes, are displayed, sorted by fold enrichment. **E)** GO analysis results using PANTHER for biological processes for MB-down genes ( $p < 0.05$ , Binomial test with Bonferroni correction, sorted by hierarchical view). The top seven GO terms, representing each ontology class and containing at least five genes, are displayed, sorted by fold enrichment. **F)** GO analysis results using PANTHER for biological processes for WH-up ( $p < 0.05$ , Binomial test with Bonferroni correction, sorted by hierarchical view). The top five GO terms, representing each ontology class and containing at least five genes, are displayed, sorted by fold enrichment. **G)** GO analysis results using PANTHER for biological processes for MB-up genes ( $p < 0.05$ , Binomial test with Bonferroni correction, sorted by hierarchical view). The top 10 GO terms, representing each ontology class and containing at least five genes, are displayed, sorted by fold enrichment.

236 almost exclusively, enrichment of GO terms related to development, for example,  
237 “metamorphosis”, “cell differentiation”, and “cell migration” (**Figure 3D and Table S6**).  
238 For MB-down genes (n = 135, **Figure 3C**) we observed enrichment only of GO terms  
239 related to metabolism (**Figure 3E and Table S6**). In fact, over half (n=73) of the MB-  
240 specific downregulated genes are annotated with the term “metabolic processes” (**Table**  
241 **S6**). Notably, there was no overlap in enriched GO terms between WH-down and MB-  
242 down genes. The highly specific effect of courtship conditioning on the regulation of  
243 metabolic genes in the MB is very interesting as it has been shown that increased  
244 energy metabolism in the MB is required for formation of olfactory LTM <sup>46</sup>. Consistent  
245 with our observations, the energy influx observed in the MB during LTM formation is not  
246 seen in other brain regions <sup>46</sup>. Thus, downregulation of many metabolic genes in the MB  
247 at 1h-AR may reflect the shifting metabolic state in the MB that is required for memory  
248 formation.

249

250 **Courtship conditioning is associated with MB-specific upregulation of synaptic**  
251 **proteins and learning and memory pathways.**

252 For WH-up genes (n= 186, **Figure 3B**) all enriched GO terms were related to  
253 biological responses, such as “cellular response to light stimulus”, “humoral immune  
254 response”, “response to other organism”, and “taxis” (**Figure 3F and Table S6**).  
255 Indeed, 62 of the WH-up genes were annotated with the term “response to stimulus”  
256 (**Table S6**). GO terms related to biological response were also enriched for MB-up  
257 genes (n = 174, **Figure 3C**). There were 5 enriched GO terms common to WH-up and  
258 MB-up genes (“response to light stimulus”, “response to abiotic stimulus”, “response to



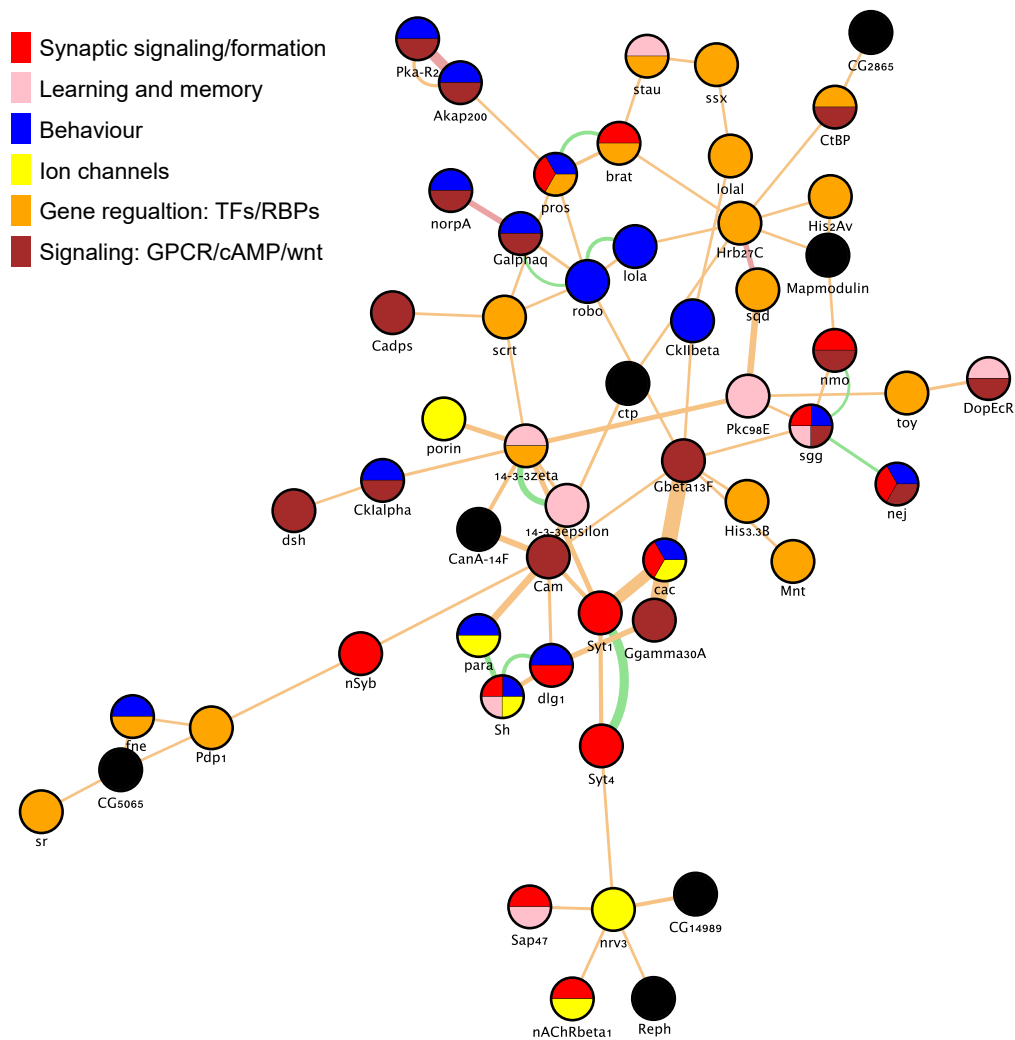

**Figure 4: Network analysis of genes that are upregulated in the MB in response to courtship conditioning.** Of 178 genes in the MB-up group, 54 form a single network based on a subset protein-protein and genetic interactions that are annotated in geneMANIA (see methods). Each node is colour coded to represent selected

259 stimulus”, “response to external stimulus”, and “taxis”) (**Table S6**). Yet the MB-up gene  
260 group showed many more enriched GO terms - 181 compared to 15 for WH-up -  
261 suggesting a high level of functional relatedness in this gene group. Using annotated  
262 protein-protein and genetic interactions, we identified a network 54 MB-up genes  
263 (**Figure 4**). This network was comprised of genes encoding ion channels, transcription  
264 factors, RNA binding proteins, and genes with functional annotations related to synapse  
265 formation, synaptic signaling, behaviour, and learning and memory (**Figure 4**).  
266 Interestingly, the most enriched GO categories that were unique for MB-up genes were  
267 related to synaptic plasticity (e.g. “regulation of calcium ion-dependent exocytosis”),  
268 behaviour (e.g. “courtship behaviour”), and memory (“e.g. “learning or memory”) (**Figure**  
269 **3G**). Taken together, these results suggest that MB-up genes encode a highly  
270 interactive group of proteins with biological relevance to learning and memory.

271       Next, we manually curated the MB-up gene group to illustrate how they may be  
272 represented in memory-relevant molecular pathways in MB KCs (**Figure 5**). During  
273 learning and memory formation KCs receive olfactory input from over 200 olfactory  
274 projection neurons (PNs) that synapse with the dendrites of the calyx<sup>47</sup>. Olfactory  
275 signals are reinforced to form memories by sensory signals from modulatory  
276 dopaminergic neurons, which synapse at discrete locations along the axons of the MB  
277 lobes<sup>22</sup>. In courtship conditioning, the primary olfactory signal is thought to be the  
278 pheromone cVA which is deposited on females by males during mating<sup>48</sup>. Courtship  
279 memory is formed when cVA is paired with sexual rejection, which is conveyed to the  
280 MB gamma lobe via a specific class of dopaminergic neurons<sup>30</sup>. Long-term courtship  
281 memory is also dependent on the production of the hormone ecdysone, which also can

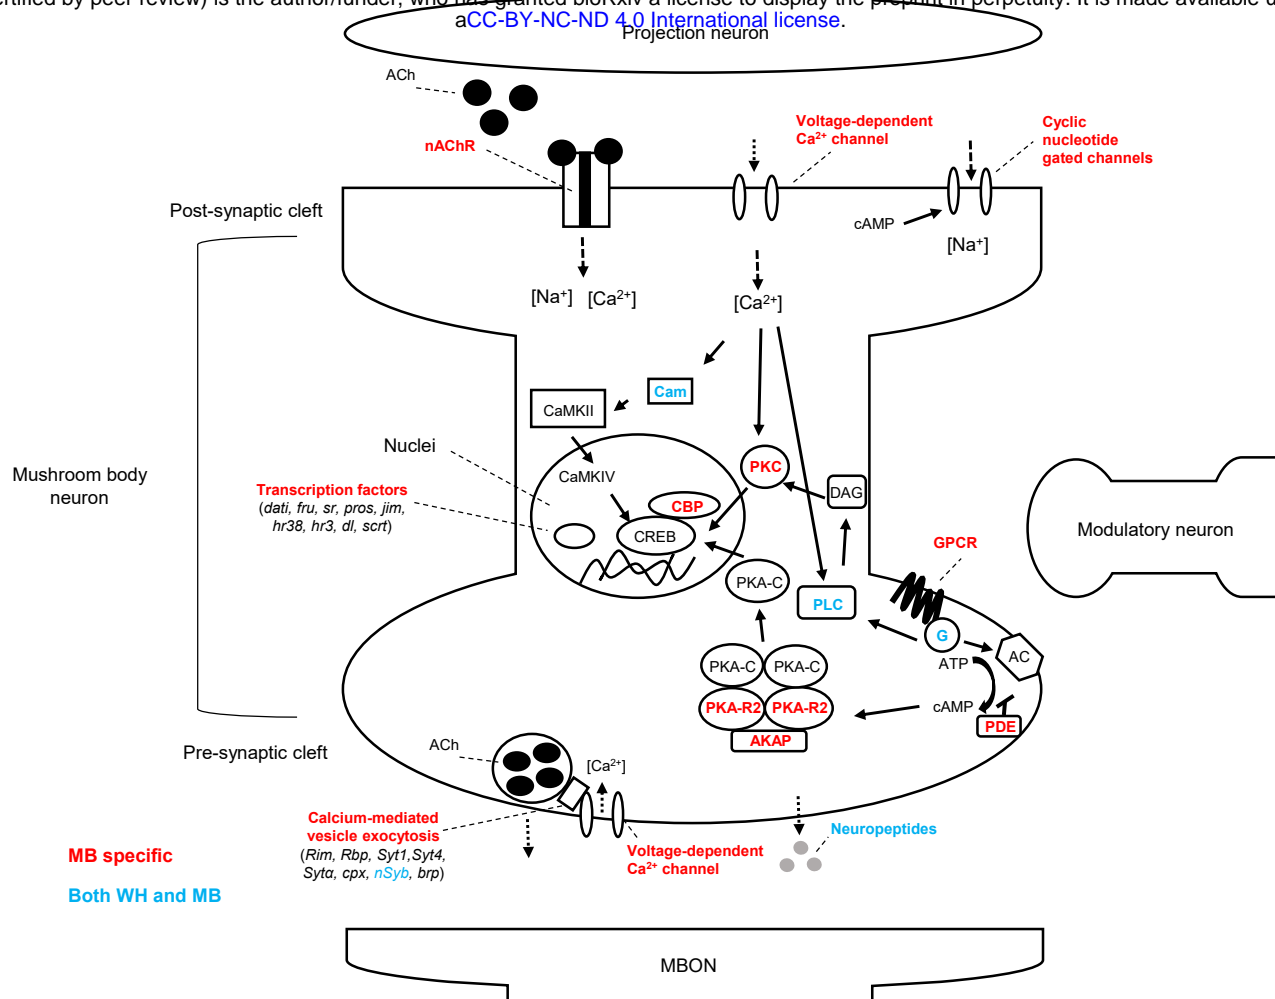

**Figure 5: Schematic representation of molecular pathways underlying memory in the mushroom body.** Manually curated diagram of memory-relevant molecular pathways in MB Kenyon cells which were identified to be differentially expressed in the MB-up gene group (shown in red). Calcium-dependent, cholinergic and cAMP signaling pathways are among the molecular pathways represented. Additionally, genes encoding proteins involved in calcium in calcium-mediated presynaptic neurotransmitter release, as well as differentially expressed transcription factors are shown.

282 also act as an input signal to KCs<sup>49,50</sup>. Olfactory PN are cholinergic and are thought to  
283 stimulate KCs through activation of nicotinic acetylcholine receptors (nAChRs), which  
284 are ligand-gated channels that induce calcium influx into KCs. Calcium influx is required  
285 for downstream signaling associated with synaptic plasticity and memory formation.  
286 Among MB-up genes, we noted several genes involved in receiving olfactory signals  
287 and mediating downstream calcium dependent signaling (**Figure 5**). These included  
288 genes encoding three nAChR subunits (*nAChR $\alpha$ 1*, *nAChR $\alpha$ 6*, *nAChR $\beta$ 1*), the  
289 acetylcholinesterase (*ace*) involved in acetylcholine recycling, the voltage-gated calcium  
290 channel *Ca-beta*, the calcium-activated signalling proteins PLC and PKC, the and the  
291 calcium-binding messenger calmodulin (*cam*). Many MB-up genes also encode proteins  
292 involved in receiving modulatory signals, and in the cAMP signaling pathway that is  
293 activated by these signals during memory formation (**Figure 5**). Notably, we identified  
294 MB-specific upregulation of four G-protein coupled receptors (GPCR). These included  
295 *oamb*, *hec*, and *SIFaR*, all known to be involved in male courtship behaviour<sup>51-53</sup>, and  
296 *DopEcR*, an atypical GPCR that responds to both dopamine and ecdysone, and is  
297 essential for cAMP signal activation during courtship memory<sup>50</sup>. We identified five MB-  
298 up genes encoding components of the heterotrimeric G-protein complex (*G $\alpha$ q*, *G $\beta$ 13F*,  
299 *G $\gamma$ 30A*, *G $\alpha$ o*, *G $\gamma$ 1*) which act directly downstream GPCRs to induce adenylate cyclase  
300 activity and production of cAMP. Several downstream cAMP signaling components  
301 were also upregulated specifically in the MB, including regulatory subunits of protein  
302 kinase A (PKA-R2), the PKA anchoring protein (*Akap200*), cAMP-gated ion channels  
303 (*Ih*, *Cngl*), and the CREB-binding protein, *nej*, a histone acetyltransferase that is thought

304 to be involved in LTM-associated gene expression<sup>54,55</sup>. Thus, many MB-up genes are  
305 directly related to receiving and processing the signals that induce courtship memory.

306 KC axons provide presynaptic output to 21 MBONs. Several MB-up genes  
307 encode proteins involved in calcium-mediated presynaptic neurotransmitter release,  
308 including the synaptic vesicle docking proteins RIM and RBP, the synaptotagmins (Syt1,  
309 Syt4, Syt $\alpha$ ), components of the SNARE complex (cpx and nSyb), the presynaptic  
310 calcium channel cacophony, and the active zone marker brp (**Figure 5**). We also  
311 observed upregulation of two neuropeptides, Nplp2, and sNPF. sNPF is has been  
312 shown to act synergistically with ACh in communicating to MBONs in the context of  
313 olfactory memory formation<sup>44</sup>. Thus, many MB-up genes are involved in transmitting  
314 memory signals to MBONs (**Figure 5**).

315 Finally, we also observed upregulation of many genes encoding transcription  
316 factors and RNA binding proteins. RNA binding proteins like stau and Orb2 are thought  
317 to be involved in LTM formation through localized regulation of translation at synapses  
318<sup>9,56</sup>. Some of the transcription factors in the MB-up group have known roles in courtship  
319 behaviour, such as dati, fru and pros<sup>57-59</sup>. Interestingly, we identified MB-specific  
320 upregulation of sr and HR38, which are transcription factors that have been proposed  
321 as markers of neuron activation in insects<sup>24,60,61</sup>.

322

## 323 **Discussion**

324 Understanding transcriptional changes that are required in neurons to mediate  
325 LTM is an important challenge in neuroscience. Many studies have identified gene  
326 expression changes after memory acquisition in *Drosophila*<sup>9-12</sup> and this approach has

327 been used to identify new genes involved in memory formation<sup>9,11,12</sup>. However, we still  
328 understand very little about the spatial and temporal requirement for transcription in  
329 LTM. When are critical memory genes activated and in which neurons? Here, we used  
330 MB-specific transcriptional profiling to identify gene expression changes that occur in  
331 response to courtship conditioning, an ethological memory paradigm that is commonly  
332 used in *Drosophila*. This analysis revealed gene expression changes in established  
333 learning and memory pathways that occurred for the most part at 1 hour after courtship  
334 rejection, but not after 24 hours. Importantly, memory related pathways were only  
335 differentially regulated in the MB and not in biologically paired WH samples. These  
336 results suggest that memory related biological processes are transiently upregulated in  
337 the MB after memory acquisition and illustrate the importance of sampling time and cell  
338 type in the identification of biologically relevant gene regulation in LTM.

339         In our study, we compared males that experienced sexual rejection to naïve  
340 socially isolated males. Although samples were collected at least one hour after  
341 exposure to a female fly, it is impossible to conclusively differentiate between  
342 transcriptional changes that occur because of sexual rejection - and long-term memory  
343 formation - and changes that might happen in response to any social interaction.  
344 Previous studies have looked at gene expression changes that occur in whole heads in  
345 response to courtship, male-male interactions, and mating<sup>37,38</sup>. As could be expected,  
346 in WH samples we do observe a significant overlap with those studies (36 genes, 1.5-  
347 fold enrichment,  $p = 0.009$ ). This suggests that some gene expression changes in whole  
348 heads represent general responses to social interactions. In contrast, we see no  
349 significant overlap between genes identified in these studies and genes that we observe

350 to be changed in the MB. In addition, the MB is not required for normal male-female  
351 interactions like courtship behaviour or mating as MB-ablated flies reproduce normally  
352 and even show normal learning in response to sexual rejection<sup>18,19</sup>. Therefore, it is  
353 reasonable to suggest that MB-specific gene expression changes we observed are  
354 likely related to memory acquisition.

355 The nature of the genes and biological pathways that are differentially expressed  
356 specifically in the MB after memory acquisition strongly suggest a role in memory. The  
357 MB-specific changes in metabolic gene expression that we observe correlate well with  
358 the MB-specific energy influx previously described for appetitive olfactory conditioning  
359<sup>46</sup>. MB-specific energy consumption during LTM is likely mediated by post-translational  
360 mechanisms such as the phosphorylation of the pyruvate dehydrogenase complex - not  
361 transcription. However, such a dramatic metabolic shift is very likely to indirectly affect  
362 the expression of metabolic genes, which could explain why more than half of MB-down  
363 genes identified in our study are linked to metabolism.

364 Genes that are upregulated in the MB after memory acquisition show a  
365 remarkable correlation with known memory pathways. From post-synaptic receptors, to  
366 signaling pathways, to presynaptic neurotransmitter release mechanisms, nearly all  
367 known aspects of memory related synaptic plasticity are accounted for (**Figures 3-5**).  
368 Some genes, like *stau* and *fru*, were previously shown to be upregulated in whole heads  
369 during and after olfactory<sup>9</sup> or courtship memory<sup>10</sup>, respectively, further validating our  
370 approach and results. However, in general, other *Drosophila* memory transcriptome  
371 studies have not observed such a profound effect on known memory related genes and  
372 pathways<sup>9-12</sup>. This is likely due to both the sampling time and cell type we investigated.

373 Certainly, memory specific transcriptional signals would be diluted in whole head  
374 analysis<sup>9-11</sup>. Widmer *et al.* used MB specific transcriptome analysis at 24 hours after  
375 appetitive olfactory memory acquisition, and consistent with our findings, identified a  
376 limited number of expression changes<sup>13</sup>. Crocker *et al.* used cell-specific patch  
377 clamping to investigate gene expression from MB neurons at 30 minutes after memory  
378 acquisition, however, they identified very few differentially expressed genes, likely due  
379 to pooling of many samples that were conditioned with different odors<sup>12</sup>. The fact that  
380 we observed many expected memory genes and pathways to be induced in the MB  
381 suggests that we have captured a critical time point for gene regulation in the formation  
382 of long-term courtship memory.

383         Many studies in mouse have profiled transcriptional changes in the hippocampus  
384 in response to fear conditioning and other memory paradigms. Consistent with our  
385 observations, these studies show more gene expression changes 30 minutes after  
386 memory acquisition, and not at later time points<sup>23</sup>. In general, however, these studies  
387 do not identify widespread differential expression of classic learning and memory  
388 pathways as we do in the fly MB. In mouse, across many different studies, fear  
389 conditioning consistently invokes strong activation of immediate early genes such as  
390 cFos, which are known to be induced in response to neuron firing. In insects, neuron  
391 activity induced genes have been more elusive, however, two genes, *hr38* and *sr*, are  
392 consistently upregulated in response to a variety of neuronal activation stimuli in flies  
393 and other insects<sup>24,60,61</sup>. It is very interesting that we observe these two genes to be  
394 specifically activated in the MB in response to sexual rejection. No other *Drosophila*  
395 memory-related transcriptome study has identified induction of these genes<sup>9-13</sup>, except



396 for Crocker *et al.* who did identify hr38 induction in the MB  $\alpha/\beta$  cells at 30 min after  
397 memory acquisition, albeit with a borderline q-value (0.058)<sup>12</sup>. This suggests that our  
398 MB-specific analysis, coupled with an appropriate sampling time, has revealed a parallel  
399 mechanism to mammals that has not previously been observed in flies, where the  
400 induction of neuron activity induced genes is observed following memory acquisition.

401 In the future, it will be important to further refine the cell types and sampling times  
402 to fully understand transcriptional dynamics associated with memory formation. Indeed,  
403 even by focusing on less than 2000 MB cells, the actual circuit involved in the formation  
404 and long-term maintenance of the memory is likely composed of far fewer cells. The  
405 specific circuits that are required for courtship memory and other memory forms are  
406 being elucidated rapidly<sup>16,31</sup> and tools are now becoming available to label these cell  
407 populations for genomic analysis<sup>12,33,62</sup>. It is likely that further focus on more discrete  
408 cell populations will be required to fully understand gene activation in LTM.

409

## 410 **Materials and Methods**

### 411 **Fly strains**

412 All *Drosophila melanogaster* strains were cultured at 25° C and 70% humidity on  
413 a 12:12 light-dark cycle. Cultures were raised on a standard medium (cornmeal-  
414 sucrose-yeast-agar) supplemented by the mold inhibitors methyl-paraben and  
415 propanoic acid<sup>25</sup>. To utilize the UAS/GAL4 expression system flies containing the MB-  
416 specific GAL4 line *R14H06-GAL4* (Bloomington Stock #48667) were crossed to flies  
417 with *UAS\_unc84-2XGFP* (*UAS-unc84::GFP*), which encodes a *C. elegans*-derived  
418 nuclear tag combined with green fluorescent protein (GFP). *R14H06-GAL4* flies were

419 generated by the Janelia Farm Flylight project <sup>36</sup> and obtained from Bloomington stock  
420 center and *UAS-unc84::GFP* flies were donated by Gilbert L. Henry, Janelia Farm  
421 Research Campus <sup>33</sup>. For courtship conditioning assays and transcriptome analysis  
422 heterozygotes generated by crossing *UAS-unc84::GFP; R14H06-GAL4* flies to  
423 *P{CaryP}attP2* (Bloomington stock# 36303). The resulting progeny referred to as MB-  
424 unc84 have the genotype *X; UAS-unc84::GFP/+; R14H06-GAL4/attP2*. Courtship  
425 conditioning was performed using pre-mated, wild-type females with a Canton-S and  
426 Oregon-R mixed genetic background generated by J. Kramer.

427

#### 428 **Courtship conditioning and sample collection**

429 Long-term courtship memory was induced as described <sup>25</sup>. Newly eclosed MB-  
430 unc84 males were collected and individually held in an isolation chamber for four to six  
431 days. Males were then trained by introducing a single pre-mated female into the  
432 isolation chamber for a period of seven hours. After training, males were separated from  
433 females and kept in isolation. Flies being used for RNA-seq analysis were collected  
434 one-hour after sexual rejection (1h-AR) and 24-hours after rejection 24h-AR. Naïve flies  
435 were also collected, and all flies were collected and flash frozen at the same time of day  
436 to avoid any gene regulatory effects due to circadian rhythm. Fly heads were isolated  
437 from the abdomen, wings, and legs by vortexing followed quickly by separation through  
438 a series of sieves. Heads were then stored at -80°C for future processing by INTACT.  
439 For each day of courtship conditioning when flies were collected for transcriptome  
440 analysis, a subset of naïve and trained males were tested for LTM induction. Statistical  
441 significance of courtship suppression was evaluated using a Mann-Whitney *U*-test.

442 **Isolation of nuclei tagged in a specific cell-type (INTACT)**

443 MB specific transcriptome analysis was accomplished using a described INTACT  
444 protocol with several modifications<sup>33</sup>. Fly heads were then suspended in 1 ml of  
445 homogenization buffer (25 mM KCl, 5 mM MgCl<sub>2</sub>, 20 mM tricine, 0.15 mM spermine,  
446 0.5 mM spermidine, 10 mM β-glycerophosphate, 0.25 mM sucrose, RNAsin Plus RNase  
447 Inhibitors (Fisher Scientific: PRN2615), 1X Halt protease inhibitors (Thermo Fisher  
448 Scientific: 78430), pH 7.8) and ground with a pestle. To disrupt the cell membrane and  
449 release nuclei into solution NP40 was added to the homogenate to an end  
450 concentration of 0.3% and the solution was Dounce homogenized 6 times using the  
451 tight pestle. The 1 ml nuclear extract was passed through a 40 μm cell strainer and a 50  
452 μl input sample was removed. This input fraction is representative of the whole head,  
453 containing both MB-specific GFP nuclei untagged non-MB nuclei. Input fractions were  
454 centrifuged to obtain a nuclear pellet which would later be used as a source for whole  
455 head RNA sequencing.

456 Antibody-bound magnetic beads were freshly prepared for each  
457 immunopurification by absorbing 1 μg of anti-GFP antibody (Invitrogen: G10362) to 60 μl  
458 of Protein G Dynabeads (Invitrogen: 10004D) according to the manufacturer's  
459 instructions. To reduce non-specific binding nuclear extracts were pre-cleared by adding  
460 60 μl of beads with no anti-GFP antibody. GFP labeled nuclei were then  
461 immunoprecipitated using GFP bound beads for 30 minutes at 4°C with rotation. After  
462 washing, these remaining bead-bound nuclei represented the MB-specific fraction that  
463 was directly processed for RNA-sequencing.

464 To investigate the specificity of this protocol a sub-group of MB and WH fractions  
465 were incubated with 20mM DRAQ5 (abcam: ab108410) at room temperature for 30  
466 minutes with rotation to label nuclei. Samples were then imaged using a Zeiss  
467 Axiolmager Z1 and the proportion of GFP positive nuclei to DRAQ5 positive nuclei was  
468 determined for three independent biological replicates.

469

### 470 **RNA isolation and RNA-sequencing**

471 RNA was isolated using a PicoPure RNA Isolation Kit (Invitrogen: KIT0204) for  
472 both the input and enriched fractions according to the manufacturer instructions.  
473 Sequencing libraries were prepared using the Nugen Ovation Drosophila RNA-Seq  
474 System 1-16 (Nugen: NU035032) according to instructions. cDNA was then sheared to  
475 a target size between 200-300 bp using a Covaris S2 sonicator according to the  
476 manufacturer's protocol. Library size was verified using the Agilent Bioanalyzer High  
477 Sensitivity DNA Kit and quantified using a Q-bit fluorometer. Libraries were sequenced  
478 on an Illumina NextSeq500 using the high output v2 75 cycle kit to a read length of 75  
479 bp with single-end reads at London Regional Genomics Centre.

480

### 481 **RNA-seq data analysis**

482 Raw sequence reads were trimmed using Prinseq quality trimming to a minimum  
483 base quality score of 30 (error probability of 1 in 1,000 base calls)<sup>63</sup>. Trimmed reads  
484 were then aligned to the *D. melanogaster* genome (Ensembl release 88, dm6) using  
485 STAR<sup>64,65</sup>. To ensure mushroom body specificity of MB samples compared to WH  
486 samples, we also aligned reads to the *C. elegans* unc-84 gene (NC\_003284.9). Only

487 uniquely aligned reads with a maximum of four mismatches were used for downstream  
488 analysis. Gene counts were obtained using HTSeq-count using the default union  
489 settings to generate genic regions<sup>66</sup>. To identify differentially expressed genes DESeq2  
490 (R version 3.3.3) was used with cut-offs of  $q < 0.05$ , fold change  $> 1.3$  up or down.  
491 Genes mapped to the y chromosome were removed from the final DE lists. To identify  
492 groups of genes with similar trends of transcriptional regulation in response to courtship  
493 conditioning we used the 'stats' package in R to perform *k*-means clustering on log<sub>2</sub> fold  
494 changes<sup>67,68</sup>.

495

## 496 **GO analysis**

497 Gene ontology (GO) analysis was performed using PANTHER<sup>69-71</sup>. For GO  
498 analysis for biological processes of DE genes between MB and WH samples (**Table ?**)  
499 we included all terms with a  $p < 0.05$  (Fisher Exact with FDR multiple test correction).  
500 For GO analysis for biological processes of DE genes resulting from courtship  
501 conditioning terms were declared significant if they had a p-value of  $< 0.05$  (Binomial test  
502 with Bonferroni correction). Results are displayed in 'hierarchical view' which groups  
503 similar terms together under the most enriched term to avoid redundancy<sup>71</sup>. Further  
504 functional analysis of the individual genes associated with each enriched term was  
505 provided by FlyBase<sup>72</sup>.

506

## 507 **Network analysis**

508 Interactions network was generated using the GeneMANIA app in Cytoscape  
509 3.4.0<sup>73,74</sup>. The network was generated using the following annotated networks: (1)

510 physical interactions - biogrid small scale studies, (2) genetic interactions – biogrid small  
511 scale studies, and (3) predicted. No related genes were integrated into the network.  
512 Nodes were colour annotated using the Cytoscape enhancedGraphics app <sup>75</sup>. Each  
513 node was annotated based on association with relevant gene ontology terms.

514

### 515 **Data Availability**

516 Supplementary material is available at Figshare. Table S1 contains read alignment and  
517 count data. Table S2 contains differential expression analysis results for mushroom  
518 body specificity. Table S3 contains gene ontology results for differentially expressed  
519 mushroom body enriched or depleted genes. Table S4 contains differential expression  
520 analysis results for mushroom body and whole head specific samples during a time  
521 course of long-term memory. Table S5 contains the results of k-means clustering of  
522 differentially expressed genes during long-term memory formation. Table S6 contains  
523 gene ontology results for clusters of differentially expressed genes identified during  
524 long-term memory formation. Gene expression data is available at GEO with the  
525 accession number: GSE115718.

526

### 527 **Acknowledgments**

528 This work was funded by a Natural Science and Engineering Research Council  
529 of Canada Discovery Grant, the Canada Research Chairs Program, and the Canadian  
530 Foundation for Innovation. We thank the Bloomington *Drosophila* Stock center and the  
531 Janelia Research Campus for providing *Drosophila* stocks. Thanks to David Carter and  
532 the London Regional Genomics Center for help with sequencing.

533 **References**

- 534 1. Tully, T., Bourtchouladze, R., Scott, R. & Tallman, J. Targeting the CREB  
535 pathway for memory enhancers. *Nat. Rev. Drug Discov.* **2**, 267–277 (2003).
- 536 2. Hawkins, R. D., Kandel, E. R. & Bailey, C. H. Molecular mechanisms of memory  
537 storage in *Aplysia*. *Biol. Bull.* **210**, 174–191 (2006).
- 538 3. Brunelli, M., Castellucci, V. & Kandel, E. R. Synaptic facilitation and behavioral  
539 sensitization in *Aplysia*: possible role of serotonin and cyclic AMP. *Science* **194**,  
540 1178–81 (1976).
- 541 4. Montarolo, P. G. *et al.* A critical period for macromolecular synthesis in long-term  
542 heterosynaptic facilitation in *Aplysia*. *Science* **234**, 1249–54 (1986).
- 543 5. Lee, D. Global and local missions of cAMP signaling in neural plasticity, learning,  
544 and memory. *Front. Pharmacol.* **6**, 1–7 (2015).
- 545 6. Bliim, N., Leshchyns'ka, I., Sytnyk, V. & Janitz, M. Transcriptional regulation of  
546 long-term potentiation. *Neurogenetics* **17**, 201–210 (2016).
- 547 7. Livingstone, M. S., Sziber, P. P. & Quinn, W. G. Loss of Calcium Calmodulin  
548 Responsiveness in Adenylate-Cyclase of *Rutabaga*, a *Drosophila* Learning  
549 Mutant. *Cell* **37**, 205–215 (1984).
- 550 8. Dudai, Y., Jan, Y. N., Byers, D., Quinn, W. G. & Benzer, S. *dunce*, a mutant of  
551 *Drosophila* deficient in learning. *Proc. Natl. Acad. Sci. U. S. A.* **73**, 1684–8 (1976).
- 552 9. Dubnau, J. *et al.* The *staufen/pumilio* pathway is involved in *drosophila* long-term  
553 memory. *Curr. Biol.* **13**, 286–296 (2003).

- 554 10. Winbush, A. *et al.* Identification of gene expression changes associated with long-  
555 term memory of courtship rejection in *Drosophila* males. *G3 (Bethesda)*. **2**, 1437–  
556 45 (2012).
- 557 11. Bozler, J. *et al.* A systems level approach to temporal expression dynamics in  
558 *Drosophila* reveals clusters of long term memory genes. *PLoS Genet.* **13**, 1–22  
559 (2017).
- 560 12. Crocker, A., Guan, X.-J., Murphy, C. T. & Murthy, M. Cell-Type-Specific  
561 Transcriptome Analysis in the *Drosophila* Mushroom Body Reveals Memory-  
562 Related Changes in Gene Expression. *Cell Rep.* **15**, 1580–1596 (2016).
- 563 13. Widmer, Y. F., Bilican, A., Bruggmann, R. & Sprecher, S. G. Regulators of long-  
564 term memory revealed by mushroom body-specific gene expression profiling in  
565 *Drosophila melanogaster*. *Genetics* **209**, (2018).
- 566 14. Cognigni, P., Felsenberg, J. & Waddell, S. Do the right thing: neural network  
567 mechanisms of memory formation, expression and update in *Drosophila*. *Curr.*  
568 *Opin. Neurobiol.* **49**, 51–58 (2018).
- 569 15. Pavlowsky, A., Schor, J., Plaçais, P. Y. & Preat, T. A GABAergic Feedback  
570 Shapes Dopaminergic Input on the *Drosophila* Mushroom Body to Promote  
571 Appetitive Long-Term Memory. *Curr. Biol.* 1–11 (2018).  
572 doi:10.1016/j.cub.2018.04.040
- 573 16. Zhao, X., Lenek, D., Dag, U., Dickson, B. J. & Keleman, K. Persistent activity in a  
574 recurrent circuit underlies courtship memory in *Drosophila*. *Elife* **7**, 1–16 (2018).



- 575 17. Johnson, B. R., Atallah, J. & Plachetzki, D. C. The importance of tissue specificity  
576 for RNA-seq: Highlighting the errors of composite structure extractions. *BMC*  
577 *Genomics* **14**, (2013).
- 578 18. de Belle, J. S. & Heisenberg, M. Associative odor learning in *Drosophila* abolished  
579 by chemical ablation of mushroom bodies. *Science* **263**, 692–695 (1994).
- 580 19. McBride, S. M. . *et al.* Mushroom Body Ablation Impairs Short-Term Memory and  
581 Long-Term Memory of Courtship Conditioning in *Drosophila melanogaster*.  
582 *Neuron* **24**, 967–977 (1999).
- 583 20. Lee, T. & Luo, L. Mosaic Analysis with a Repressible Cell Marker for Studies of  
584 Gene Function in Neuronal Morphogenesis. *Neuron* **22**, 451–461 (1999).
- 585 21. Jefferis, G. S. X. E. *et al.* Comprehensive Maps of *Drosophila* Higher Olfactory  
586 Centers: Spatially Segregated Fruit and Pheromone Representation. *Cell* **128**,  
587 1187–1203 (2007).
- 588 22. Aso, Y. *et al.* The neuronal architecture of the mushroom body provides a logic for  
589 associative learning. *Elife* **3**, e04577 (2014).
- 590 23. Peixoto, L. L. *et al.* Memory acquisition and retrieval impact different epigenetic  
591 processes that regulate gene expression. *BMC Genomics* **16 Suppl 5**, S5 (2015).
- 592 24. Chen, X., Rahman, R., Guo, F. & Rosbash, M. Genome-wide identification of  
593 neuronal activity-regulated genes in *drosophila*. *Elife* **5**, 1–21 (2016).
- 594 25. Koemans, T. S. *et al.* *Drosophila* Courtship Conditioning As a Measure of  
595 Learning and Memory. *J. Vis. Exp.* 1–11 (2017). doi:10.3791/55808

- 596 26. Kramer, J. M. *et al.* Epigenetic regulation of learning and memory by *Drosophila*  
597 EHMT/G9a. *PLoS Biol.* **9**, e1000569 (2011).
- 598 27. Keleman, K., Krüttner, S., Alenius, M. & Dickson, B. J. Function of the *Drosophila*  
599 CPEB protein Orb2 in long-term courtship memory. *Nat. Neurosci.* **10**, 1587–93  
600 (2007).
- 601 28. Spieth, H. T. Courtship Behavior in *Drosophila*. *Annu. Rev. Entomol.* **19**, 385–405  
602 (1974).
- 603 29. Siegel, R. W. & Hall, J. C. Conditioned responses in courtship behavior of normal  
604 and mutant *Drosophila*. *Proc. Natl. Acad. Sci. U. S. A.* **76**, 3430–3434 (1979).
- 605 30. Keleman, K. *et al.* Dopamine neurons modulate pheromone responses in  
606 *Drosophila* courtship learning. *Nature* **489**, 145–9 (2012).
- 607 31. Montague, S. A. & Baker, B. S. Memory elicited by courtship conditioning requires  
608 mushroom body neuronal subsets similar to those utilized in appetitive memory.  
609 *PLoS One* **11**, 1–24 (2016).
- 610 32. Ejima, A. *et al.* Generalization of Courtship Learning in *Drosophila* Is Mediated by  
611 cis-Vaccenyl Acetate. *Curr. Biol.* **17**, 599–605 (2007).
- 612 33. Henry, G. L., Davis, F. P., Picard, S. & Eddy, S. R. Cell type-specific genomics of  
613 *Drosophila* neurons. *Nucleic Acids Res.* **40**, 9691–704 (2012).
- 614 34. Deal, R. B. & Henikoff, S. A simple method for gene expression and chromatin  
615 profiling of individual cell types within a tissue. *Dev. Cell* **18**, 1030–1040 (2010).
- 616 35. Steiner, F. A., Talbert, P. B., Kasinathan, S., Deal, R. B. & Henikoff, S. Cell-type-

- 617 specific nuclei purification from whole animals for genome-wide expression and  
618 chromatin profiling. *Genome Res.* **22**, 766–777 (2012).
- 619 36. Jenett, A. *et al.* A GAL4-Driver Line Resource for Drosophila Neurobiology. *Cell*  
620 *Rep.* **2**, 991–1001 (2012).
- 621 37. Ellis, L. L. & Carney, G. E. Socially-responsive gene expression in male  
622 *Drosophila melanogaster* is influenced by the sex of the interacting partner.  
623 *Genetics* **187**, 157–169 (2011).
- 624 38. Ellis, L. L. & Carney, G. E. Mating alters gene expression patterns in *Drosophila*  
625 *melanogaster* male heads. *BMC Genomics* **11**, (2010).
- 626 39. Noveen, a, Daniel, a & Hartenstein, V. Early development of the *Drosophila*  
627 mushroom body: the roles of *eyeless* and *dachshund*. *Development* **127**, 3475–  
628 3488 (2000).
- 629 40. Brooks, E. S. *et al.* A putative vesicular transporter expressed in *Drosophila*  
630 mushroom bodies that mediates sexual behavior may define a neurotransmitter  
631 system. *Neuron* **72**, 316–329 (2011).
- 632 41. Kurusu, M. *et al.* Genetic control of development of the mushroom bodies, the  
633 associative learning centers in the *Drosophila* brain, by the *eyeless*, twin of  
634 *eyeless*, and *dachshund* genes. *Proc. Natl. Acad. Sci.* **97**, 2140–2144 (2000).
- 635 42. Blum, A. L., Li, W., Cressy, M. & Dubnau, J. Short- and long-term memory in  
636 *Drosophila* require cAMP signaling in distinct neuron types. *Curr. Biol.* **19**, 1341–  
637 50 (2009).

- 638 43. Zhang, J., Tanenhaus, A. K., Davis, J. C., Hanlon, B. M. & Yin, J. C. P. Spatio-  
639 temporal in vivo recording of dCREB2 dynamics in *Drosophila* long-term memory  
640 processing. *Neurobiol. Learn. Mem.* **118**, 80–88 (2015).
- 641 44. Barnstedt, O. *et al.* Memory-Relevant Mushroom Body Output Synapses Are  
642 Cholinergic. *Neuron* **89**, 1237–1247 (2016).
- 643 45. Gu, H. Cholinergic Synaptic Transmission in Adult *Drosophila* Kenyon Cells In  
644 Situ. *J. Neurosci.* **26**, 265–272 (2006).
- 645 46. Plaçais, P. Y. *et al.* Upregulated energy metabolism in the *Drosophila* mushroom  
646 body is the trigger for long-term memory. *Nat. Commun.* **8**, (2017).
- 647 47. Caron, S., Ruta, V., Abbott, L. F. & Axel, R. Random Convergence of Olfactory  
648 Inputs in the *Drosophila* Mushroom Body. *Nature* **497**, 113–117 (2013).
- 649 48. Everaerts, C., Farine, J. P., Cobb, M. & Ferveur, J. F. *Drosophila* cuticular  
650 hydrocarbons revisited: Mating status alters cuticular profiles. *PLoS One* **5**, 1–12  
651 (2010).
- 652 49. Ishimoto, H., Sakai, T. & Kitamoto, T. Ecdysone signaling regulates the formation  
653 of long-term courtship memory in adult *Drosophila melanogaster*. *Proc. Natl.*  
654 *Acad. Sci. U. S. A.* **106**, 6381–6386 (2009).
- 655 50. Ishimoto, H., Wang, Z., Rao, Y., Wu, C. F. & Kitamoto, T. A Novel Role for  
656 Ecdysone in *Drosophila* Conditioned Behavior: Linking GPCR-Mediated Non-  
657 canonical Steroid Action to cAMP Signaling in the Adult Brain. *PLoS Genet.* **9**,  
658 (2013).

- 659 51. Li, Y. *et al.* The hector G-protein coupled receptor is required in a subset of  
660 fruitless neurons for male courtship behavior. *PLoS One* **6**, (2011).
- 661 52. Sellami, A. & Veenstra, J. A. SIFamide acts on fruitless neurons to modulate  
662 sexual behavior in *Drosophila melanogaster*. *Peptides* **74**, 50–56 (2015).
- 663 53. Zhou, C. *et al.* Molecular Genetic Analysis of Sexual Rejection: Roles of  
664 Octopamine and Its Receptor OAMB in *Drosophila* Courtship Conditioning. *J.*  
665 *Neurosci.* **32**, 14281–14287 (2012).
- 666 54. Alarcón, J. M. *et al.* Chromatin acetylation, memory, and LTP are impaired in  
667 CBP<sup>+/-</sup> mice: A model for the cognitive deficit in Rubinstein-Taybi syndrome and  
668 its amelioration. *Neuron* **42**, 947–959 (2004).
- 669 55. Hirano, Y. *et al.* Shifting transcriptional machinery is required for long-term  
670 memory maintenance and modification in *Drosophila* mushroom bodies. *Nat.*  
671 *Commun.* **7**, 13471 (2016).
- 672 56. Khan, M. R. *et al.* Amyloidogenic oligomerization transforms *Drosophila orb2* from  
673 a translation repressor to an activator. *Cell* **163**, 1468–1483 (2015).
- 674 57. Grosjean, Y., Guenin, L., Bardet, H. M. & Ferveur, J. F. Prospero mutants induce  
675 precocious sexual behavior in *Drosophila* males. *Behav. Genet.* **37**, 575–584  
676 (2007).
- 677 58. Schinaman, J. M., Giesey, R. L., Mizutani, C. M., Lukacsovich, T. & Sousa-Neves,  
678 R. The KRÜPPEL-Like Transcription Factor DATILÓGRAFO Is Required in  
679 Specific Cholinergic Neurons for Sexual Receptivity in *Drosophila* Females. *PLoS*

- 680 *Biol.* **12**, (2014).
- 681 59. Manoli, D. S. *et al.* Male-specific fruitless specifies the neural substrates of  
682 *Drosophila* courtship behaviour. *Nature* **436**, 395–400 (2005).
- 683 60. Fujita, N. *et al.* Visualization of neural activity in insect brains using a conserved  
684 immediate early gene, Hr38. *Curr. Biol.* **23**, 2063–2070 (2013).
- 685 61. Lutz, C. C. & Robinson, G. E. Activity-dependent gene expression in honey bee  
686 mushroom bodies in response to orientation flight. *J. Exp. Biol.* **216**, 2031–2038  
687 (2013).
- 688 62. Southall, T. D. *et al.* Cell-type-specific profiling of gene expression and chromatin  
689 binding without cell isolation: Assaying RNA pol II occupancy in neural stem cells.  
690 *Dev. Cell* **26**, 101–112 (2013).
- 691 63. Schmieder, R. & Edwards, R. Quality control and preprocessing of metagenomic  
692 datasets. *Bioinformatics* **27**, 863–864 (2011).
- 693 64. Dobin, A. *et al.* STAR: Ultrafast universal RNA-seq aligner. *Bioinformatics* **29**, 15–  
694 21 (2013).
- 695 65. Aken, B. L. *et al.* The Ensembl Gene Annotation System. *Database (Oxford)*.  
696 **2016**, baw093 (2016).
- 697 66. Anders, S., Pyl, P. T. & Huber, W. HTSeq-A Python framework to work with high-  
698 throughput sequencing data. *Bioinformatics* **31**, 166–169 (2015).
- 699 67. Love, M. I., Huber, W. & Anders, S. Moderated estimation of fold change and  
700 dispersion for RNA-seq data with DESeq2. *Genome Biol.* **15**, 1–21 (2014).

- 701 68. R Core Team. R: A language and environment for statistical computing. (2016).
- 702 69. Ashburner, M. *et al.* Gene Ontology: Tool for the unification of biology. *Nat.*  
703 *Genet.* **25**, 25–29 (2000).
- 704 70. Carbon, S. *et al.* Expansion of the gene ontology knowledgebase and resources:  
705 The gene ontology consortium. *Nucleic Acids Res.* **45**, D331–D338 (2017).
- 706 71. Mi, H. *et al.* PANTHER version 11: Expanded annotation data from Gene  
707 Ontology and Reactome pathways, and data analysis tool enhancements. *Nucleic*  
708 *Acids Res.* **45**, D183–D189 (2017).
- 709 72. Gramates, L. S. *et al.* FlyBase at 25: Looking to the future. *Nucleic Acids Res.* **45**,  
710 D663–D671 (2017).
- 711 73. Montojo, J., Zuberi, K., Rodriguez, H., Bader, G. D. & Morris, Q. GeneMANIA:  
712 Fast gene network construction and function prediction for Cytoscape.  
713 *F1000Research* **3**, 1–7 (2014).
- 714 74. Su, G., Morris, J., Demchak, B. & Bader, G. Biological Network Exploration With  
715 Cytoscape 3. *Curr. Protoc. Bioinforma.* **47**, 8.13.1-8.13.24 (2014).
- 716 75. Morris, J. H., Kuchinsky, A., Ferrin, T. E. & Pico, A. R. enhancedGraphics: a  
717 Cytoscape app for enhanced node graphics. *F1000Research* **3**, 1–8 (2014).
- 718
- 719
- 720
- 721
